# Supplementary material for: LAMP-LFD Based on Isothermal Amplification of Multicopy Gene ORF160b: Applicability for Highly Sensitive Low-Tech Screening of Allergenic Soybean (Glycine max) in Food
Source: PubMed Central journal article supplement (PMC7760099; doi:10.3390/foods9121741), 2020-11-26
Supplement: foods-09-01741-s001.pdf [file foods-09-01741-s001.pdf]

## Supplementary material

# LAMP-LFD Based on Isothermal Amplification of Multicopy Gene *ORF160b*: Applicability for Highly Sensitive Low-tech Screening of Allergenic Soybean (*Glycine max*) in Food

Stefanie M. Allgöwer, Chris A. Hartmann, Clarissa Lipinski, Vera Mahler, Stefanie Randow, Elke Völker, and Thomas Holzhauser \*

Division of Allergology, Paul-Ehrlich-Institut (PEI), D-63225 Langen, Germany; stefanie.allgöwer@arcor.de (S.M.A.); chris.a.hartmann@gmx.de (C.A.H.); dr.clarissa.lipinski@gmail.com (C.L.); vera.mahler@pei.de (V.M.); stefanie.randow@pei.de (S.R.); elke.völker@pei.de (E.V.);

\* Correspondence: [thomas.holzhauser@pei.de](mailto:thomas.holzhauser@pei.de); Tel.: +49-6103-77-5304 (T.H.)

**Table S1.** Specificity testing of two commercial protein-based LFD tests compared to *ORF160b* LAMP-LFD. Yellow soybean served as positive control (+: positive test line; -: negative test line).

| Sample No. | Common Name                     | Species Name                                     | Family              | <i>ORF160b</i>        |      |      |
|------------|---------------------------------|--------------------------------------------------|---------------------|-----------------------|------|------|
|            |                                 |                                                  |                     | LAMP-LFD <sup>3</sup> | LFD1 | LFD2 |
| 1          | peanut <sup>1,2</sup>           | <i>Arachis hypogaea</i>                          | <i>Fabaceae</i>     | -                     | -    | -    |
| 2          | sesame seed <sup>1</sup>        | <i>Sesamum indicum</i>                           | <i>Pedaliaceae</i>  | -                     | -    | -    |
| 3          | cow's milk <sup>1</sup>         | <i>Bos taurus</i>                                | <i>Bovidae</i>      | -                     | -    | -    |
| 4          | oat <sup>1</sup>                | <i>Avena sativa</i>                              | <i>Poaceae</i>      | -                     | -    | -    |
| 5          | barley <sup>1</sup>             | <i>Hordeum vulgare</i>                           | <i>Poaceae</i>      | -                     | -    | -    |
| 6          | rye <sup>1</sup>                | <i>Secale cereale</i>                            | <i>Poaceae</i>      | -                     | -    | -    |
| 7          | wheat <sup>1</sup>              | <i>Triticum sp.</i>                              | <i>Poaceae</i>      | -                     | -    | -    |
| 8          | brown lentil <sup>2</sup>       | <i>Lens culinaris</i>                            | <i>Fabaceae</i>     | -                     | -    | -    |
| 9          | pea <sup>2</sup>                | <i>Pisum sativum</i>                             | <i>Fabaceae</i>     | -                     | -    | -    |
| 10         | white mustard seed <sup>1</sup> | <i>Sinapis alba</i>                              | <i>Brassicaceae</i> | -                     | -    | -    |
| 11         | blue lupine <sup>1,2</sup>      | <i>Lupinus angustifolius</i>                     | <i>Fabaceae</i>     | -                     | -    | -    |
| 12         | yellow lupine <sup>1,2</sup>    | <i>Lupinus luteus</i>                            | <i>Fabaceae</i>     | -                     | -    | -    |
| 13         | white lupine <sup>1,2</sup>     | <i>Lupinus albus</i>                             | <i>Fabaceae</i>     | -                     | -    | -    |
| 14         | hazelnut <sup>1</sup>           | <i>Corylus avellana</i>                          | <i>Betulaceae</i>   | -                     | -    | -    |
| 15         | spelt <sup>1</sup>              | <i>Triticum aestivum</i> subsp.<br><i>spelta</i> | <i>Poaceae</i>      | -                     | -    | -    |
| 16         | squid <sup>1</sup>              | <i>Loligo formosana</i>                          | <i>Loliginidae</i>  | -                     | -    | -    |
| 17         | celeriac <sup>1</sup>           | <i>Apium graveolens</i> var.<br><i>rapaceum</i>  | <i>Apiaceae</i>     | -                     | -    | -    |
| 18         | soybean <sup>1,2</sup>          | <i>Glycine max</i>                               | <i>Fabaceae</i>     | +                     | +    | +    |

<sup>1</sup> require mandatory labeling as ingredient according to EU Directive 1169/2011; <sup>2</sup> legume (*Fabaceae*);

<sup>3</sup> previously published [18].

**Table S2.** Primers for *ORF160b* LAMP, *lectin* qPCR and eukaryotic *18S rRNA* qPCR used in this study.

| Target Gene                  | primer name        | sequence (5'→3')                                   |
|------------------------------|--------------------|----------------------------------------------------|
| <i>ORF160b</i> <sup>1</sup>  | F3 ORF160b         | CCGAGTCTGCTGCCGTAT                                 |
|                              | B3 ORF160b         | ATGAGATTGAGTTCCACGCA                               |
|                              | FIP ORF160b        | GGGGTCAGTATTACGCCTCTGACAAAGAAAGAGAGTGACGATG        |
|                              | biotin-FIP ORF160b | biotin-GGGGTCAGTATTACGCCTCTGACAAAGAAAGAGAGTGACGATG |
|                              | BIP ORF160b        | TCTGATAGATAGTGGCAAACATTAGTTGCTGCTATTCCATCTATTCAT   |
|                              | LoopF ORF160b      | TTCTGATTCCGCTCATTGG                                |
|                              | FITC-LoopF ORF160b | FITC-TTCTGATTCCGCTCATTGG                           |
|                              | LoopB ORF160b      | CAAGATATAGAAGACTATTAGCCCCG                         |
| <i>Lectin</i> <sup>2</sup>   | Lectin-F           | TCCACCCCCATCCACATTT                                |
|                              | Lectin-R           | GGCATAGAAGGTGAAGTTGAAGGA                           |
|                              | Lectin-probe       | ROX-AACCGGTAGCGTTGCCAGCTTCG-BBQ-650                |
| <i>18S rRNA</i> <sup>3</sup> | TR03 (forward)     | TCTGCCCTATCAACTTTCGATGGTA                          |
|                              | TR04 (reverse)     | AATTGCGCGCCTGCTGCCTTCCTT                           |

<sup>1</sup>[18]; <sup>2</sup>[20]; <sup>3</sup>[21].

## References

- [18] Allgöwer, S.M.; Hartmann, C.A.; Holzhauser, T. Sensitive detection of allergenic soybean (*Glycine max*) using multicopy gene loop-mediated isothermal amplification combined with lateral flow dipstick (LAMP-LFD). *Foods* **2020**, *9*(4):423, 2-19.
- [20] BVL Official collection of Test methods. Detection and quantification of mustard (*Sinapis alba*) and soybean (*Glycine max*) in boiled sausages with real-time PCR. *German Food and Feed Law-Food Analysis* **2012**, Article 64, L 08.00-59, 1-15.
- [21] Allmann, M.; Candrian, U.; Höfelein, C.; Lüthy, J. Polymerase chain reaction (PCR): a possible alternative to immunochemical methods assuring safety and quality of food, Detection of wheat contamination in non-wheat food products, *Z Lebensm Unters Forsch* **1993**, *196*(3), 248-251.

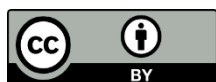

© 2020 by the authors. Submitted for possible open access publication under the terms and conditions of the Creative Commons Attribution (CC BY) license (<http://creativecommons.org/licenses/by/4.0/>).
